# Supplementary material for: Non-destructive methods to assess health of wild tropical frogs (túngara frogs: Engystomops pustulosus) in Trinidad reveal negative impacts of agricultural land
Source: PubMed Central journal article supplement (PMC9119901; doi:10.1007/s11356-022-20105-4), 2022-04-24
Supplement: 11356_2022_20105_MOESM1_ESM.pdf [file 11356_2022_20105_MOESM1_ESM.pdf]

# Supplementary Material

Non-destructive methods to assess health of wild tropical frogs (túngara frogs: *Engystomops pustulosus*) in Trinidad reveal negative impacts of agricultural land

Frances Orton<sup>a\*</sup>, Stephanie Mangan<sup>b</sup>, Laura Newton<sup>a</sup> & Alexis Marianes<sup>c</sup>

\* Corresponding/Senior author

a: School of Health and Life Sciences, University of the West of Scotland, Paisley, Scotland PA1 2BB b: School of Science, University of Waikato, Hamilton, New Zealand, 3216

c: Sustainable Innovation Initiatives, 9735 SW 166 Terr, Miami, FL 33157, USA

Table S1. Co-ordinates of sampling sites in Trinidad

| <b>Year</b>    | <b>Site Name</b> | <b>Code</b> | <b>GPS Co-ordinates</b>  | <b>Decimal co-ordinates</b> |
|----------------|------------------|-------------|--------------------------|-----------------------------|
| <b>2016</b>    | Brasso Seco      | BS          | N10°30.155, W61°26.958   | 10.502583, -61.449300       |
| <b>2016</b>    | Cumuto Road      | CR          | N10°44.586, W61°18.569   | 10.743100, -61.309483       |
| <b>2016</b>    | Aripo Savannah   | AS          | N10°36.913, W61°12.228   | 10.615217, -61.203800       |
| <b>2016</b>    | Caura 1          | C1          | N10° 41.511, W61° 21.557 | 10.691850, -61.359283       |
| <b>2016</b>    | Lopinot 2        | L2          | N10° 40.046, W61° 19.751 | 10.667433, -61.329183       |
| <b>2016</b>    | Lopinot 3        | L3          | N10° 39.475, W61° 19.647 | 10.657917, -61.327450       |
| <b>2016</b>    | Lopinot 4        | L4          | N10° 39.475, W61° 19.574 | 10.657917, -61.326233       |
| <b>2016</b>    | Arena Forest     | AF          | N10° 35.208, W61° 13.884 | 10.586800, -61.231400       |
| <b>2016</b>    | Caura 2          | C2          | N10° 41.910, W61° 21.552 | 10.698500, -61.359200       |
| <b>2016/18</b> | Lopinot 1        | L1          | N10°41.386, W61°19.394   | 10.689767, -61.323233       |
| <b>2018</b>    | Lopinot 5        | L5          | N10°41.406, W61°19.538   | 10.689777, -61.323400       |
| <b>2018</b>    | Caroni Fields    | CF          | N10°35.471, W61°22.820   | 10.591183, -61.380333       |
| <b>2018</b>    | Sant Cruz 1      | SC1         | N10°43.149, W61°27.526   | 10.719150, -61.458767       |
| <b>2018</b>    | Santa Cruz 2     | SC2         | N10°43.942, W61°28.180   | 10.732367, -61.469667       |
| <b>2018</b>    | Santa Cruz 3     | SC3         | N10°44.223, W61°28.323   | 10.737050, -61.472050       |

## Figure S1. Google maps of selected sampling sites in Trinidad

### Reference Sites

#### Cumuto Road (2016)

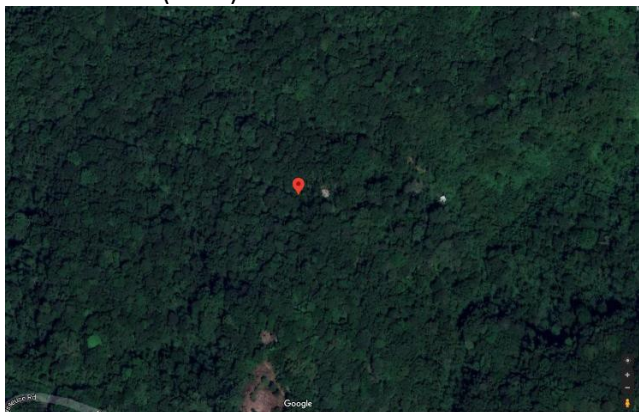

#### Caura 1 (2016)

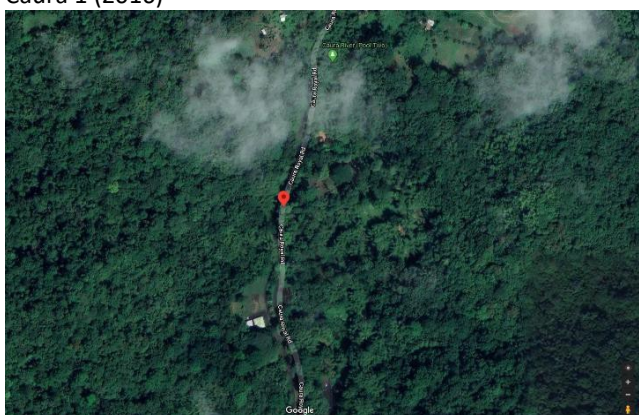

#### Arena Building (2016)

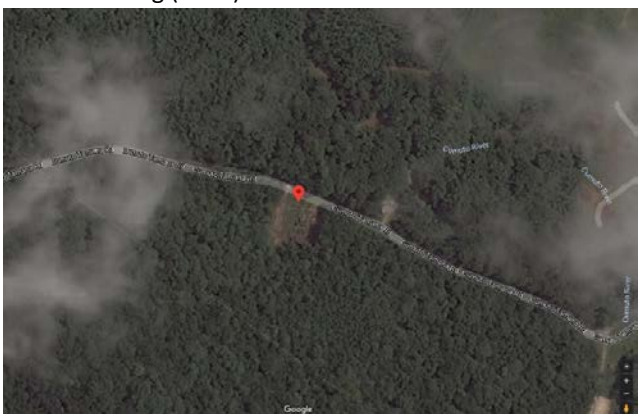

#### Lopinot 2 (2016)

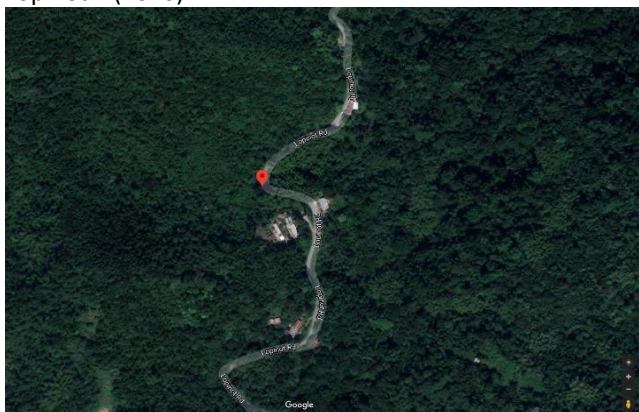

Santa Cruz 1 (2018)

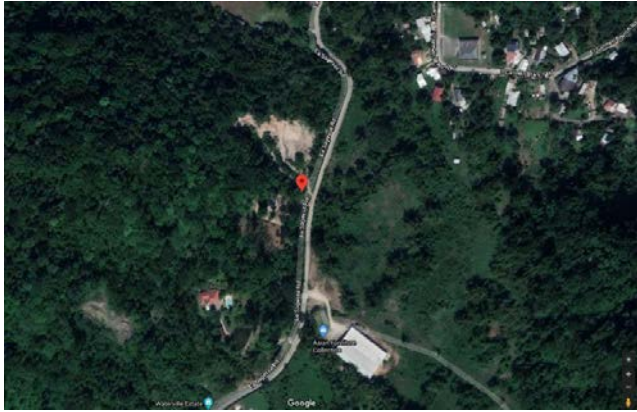

Suburban Sites

Lopinot 3 (2016)

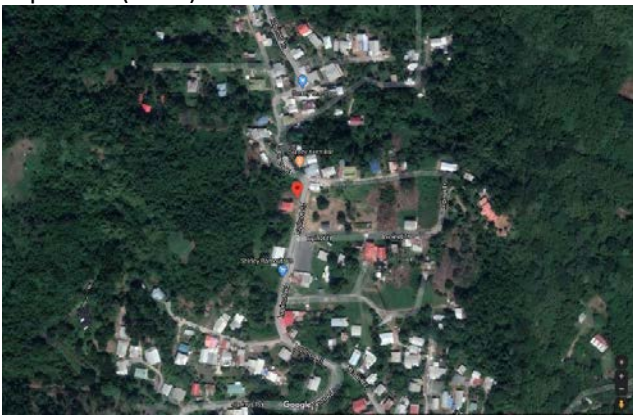

Lopinot 4 (2016)

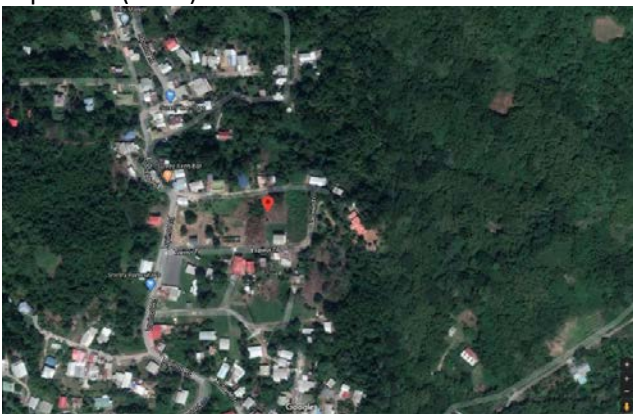

Lopinot 1 (2016/2018)

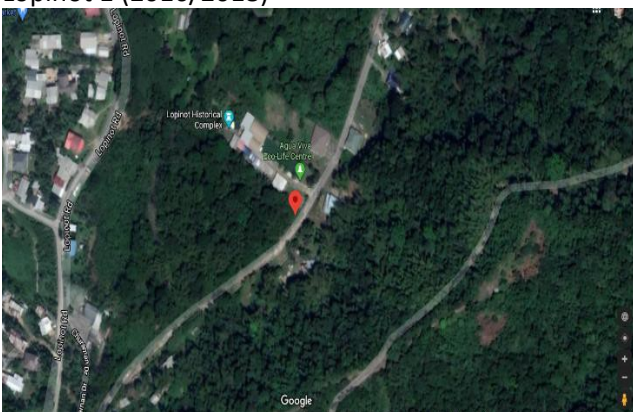

Lopinot 5 (2018)

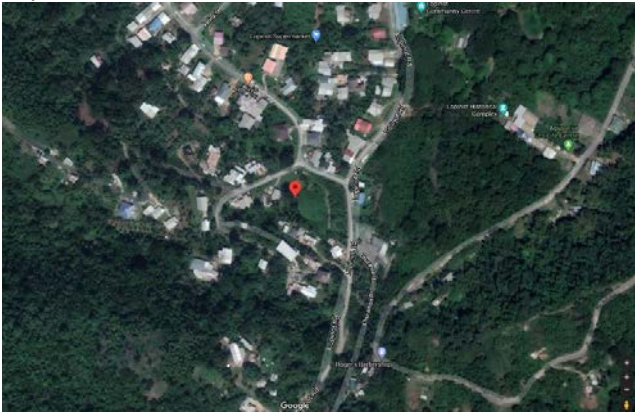

Santa Cruz 2 (2018)

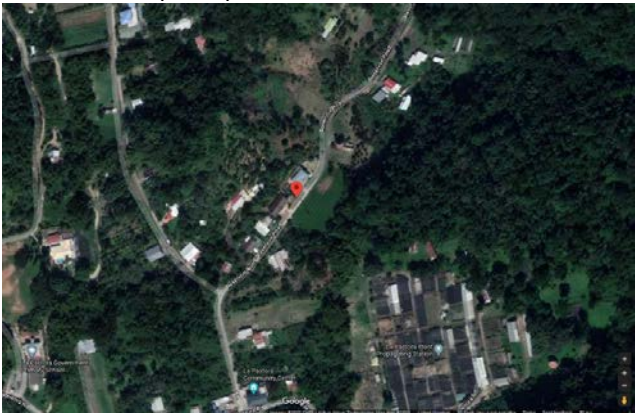

Santa Cruz 3 (2018)

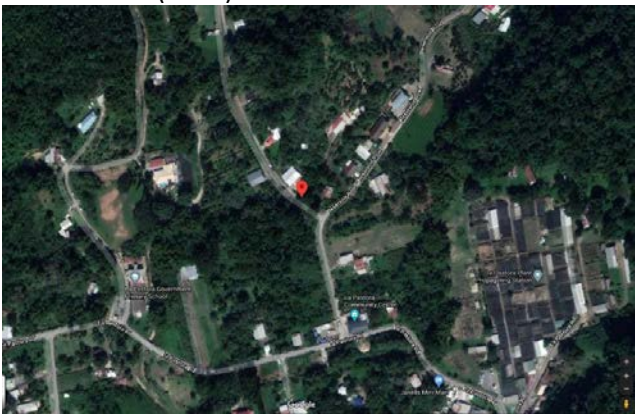

## Agricultural Sites

Brasso Seco (2016)

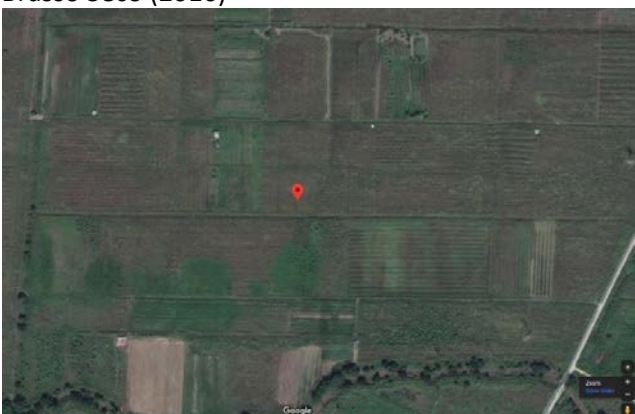

Aripo savannah (2016)

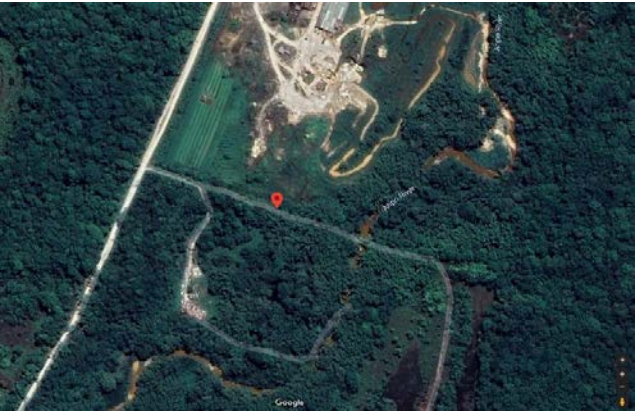

Caura 2 (2016)

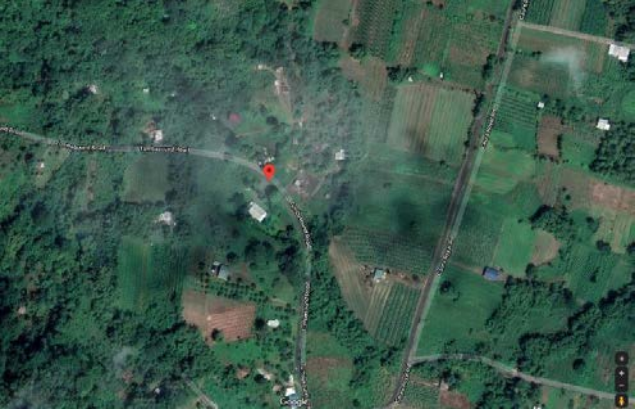

Caroni Fields (2018)

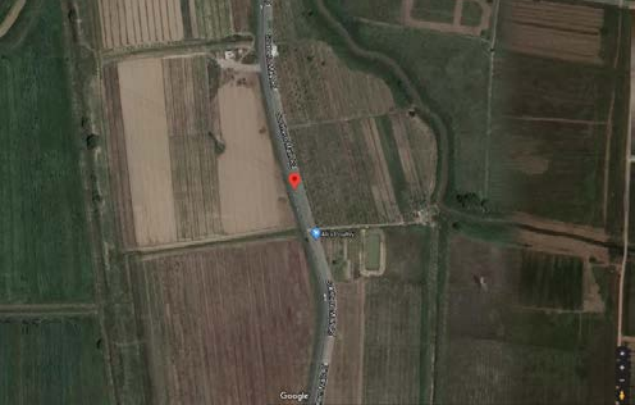

## Text S1. Description of forelimb width and nuptial pad measurements

Forelimb width (2016 and 2018) and nuptial pad length (2018) were measured from photographs. These measurements could not be obtained for all frogs, as for some photographs, the forelimb was hidden under the body and/or the photograph quality was not sufficient (ie, blurry). For the photographs from 2016, fingernail width/length of a known empirical width/length were used as a scale and for the photographs from 2018, a ruler was used as a scale. All measurements were recorded twice and the mean, standard deviation and covariance of variation (COV) were calculated. If the COV was  $>5\%$ , a third measurement was carried out and the two results found to be closest together were used to calculate the final mean.

### Measurement Process

Select frog photo and open with adobe Photoshop

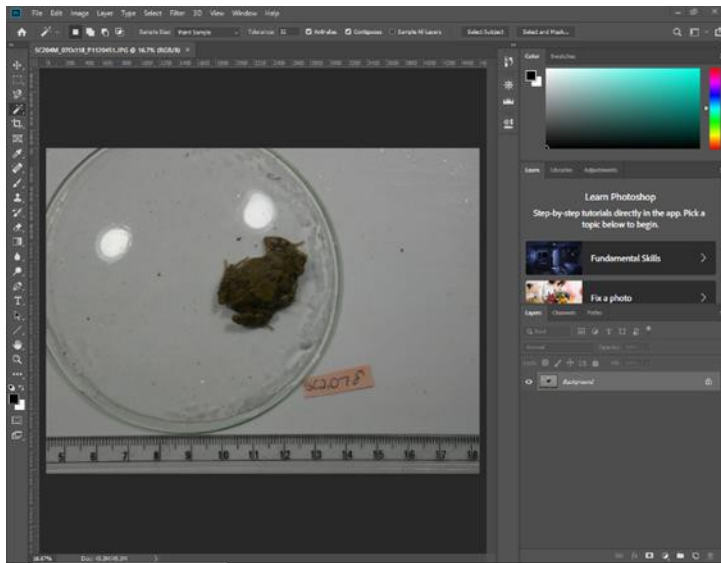

Enlarge photo as far as possible on the scale being used, e.g. the ruler in the photo below

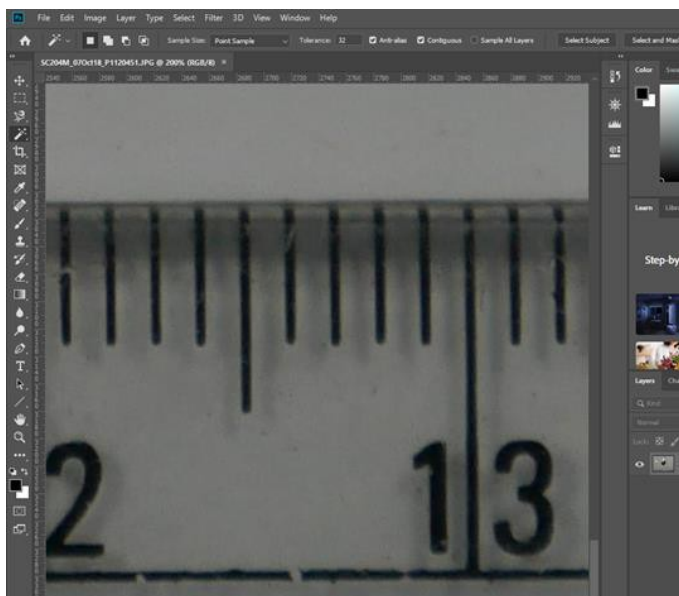

Set the scale by selecting Image – Analysis – Set Measurement Scale – Custom. A dialogue box ‘Measurement Scale’ then appears

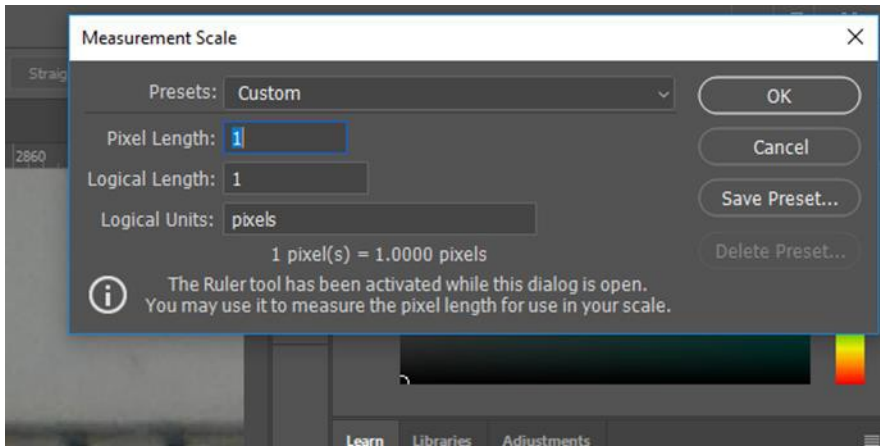

Select the Ruler tool from the options on the left and drag across the ruler ensuring the same area is standardised for every photo (left edge of mm mark)

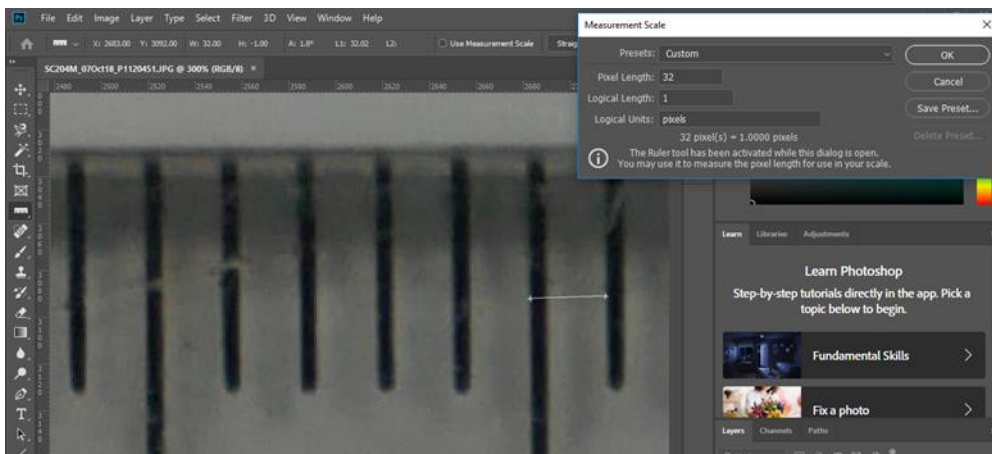

Once selected, the pixel length will appear, which is used to standardise measurements to 1mm ('X' pixels = 1mm)

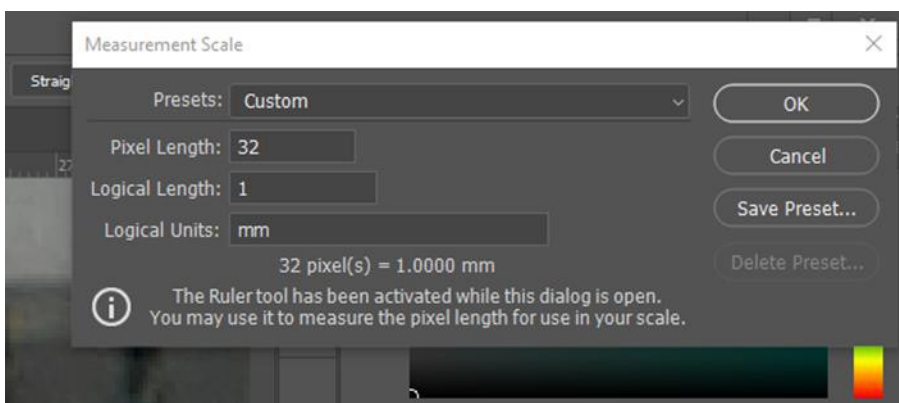

Select the 'Line tool' from options on the left – for the forelimb, drag across ensuring the line is always at a right angle to the length of the arm; for the nuptial pad length – drag the line along the length of the nuptial pad. Hold the line across the arm and without clicking off, take note of the 'Forearm Pixel Number' which is the 'L' value that appears in the box. To calculate the forelimb width/nuptial pad length the following calculation was used:  $(\text{forelimb pixel number} / \text{scale pixel number}) * \text{scale length}$ .



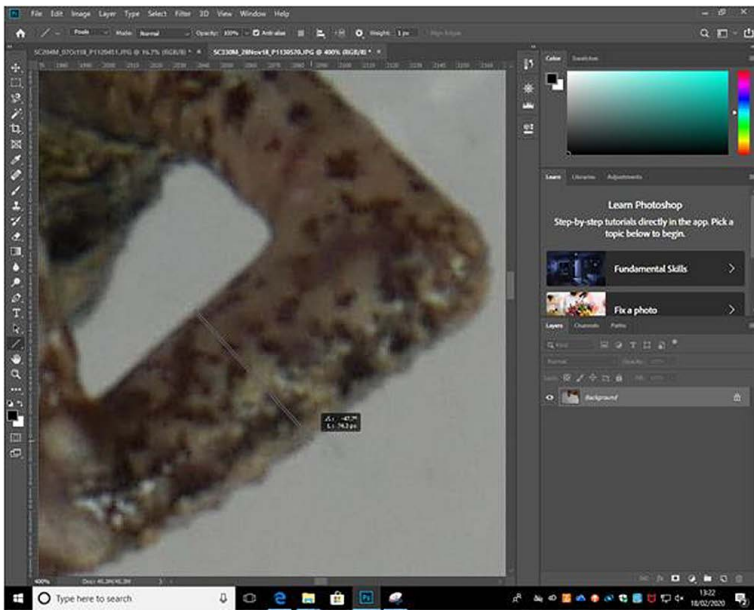

## Text S2. Methods used for analysing chemicals in tadpole samples

Tadpole samples were homogenised with dry ice. For GC/MS-MS (Table S1), QuECHERS method was used: 10 g of sample, add 10 mL of acetonitrile, shake 2 min in vortex, add 4 g of magnesium sulfate, 1 g of sodium chloride, 1 g of sodium citrate dehydrate and 0.5 g of sodium citrate sesquihydrate. Then shake 2 min in vortex and centrifuge 6 min at 3500 rpm. 1  $\mu$ l of extract was injected into the GC-MS. For UPLC/MS-MS (Table S2), 100  $\mu$ l of extract was diluted with 900  $\mu$ l water:methanol (80:20) , and 1 $\mu$ l was injected into the UPLC-MS. For analysis of polar compounds by UPLC/MS-MS (Table S2, identified by an asterisk), 10 g of sample was extracted with 25 mL of methanol (1% formic acid), shaken with a vortex for 4 min and centrifuged for 6 min at 3500 rpm. For glyphosate/glyphonate, 3  $\mu$ l were injected and for the other polar compounds, 5  $\mu$ l was injected.

## MÉTHOD OF ANÁLISIS OF MULTIPLE PESTICIDE RESIDUES IN TADPOLES

### Identification

To identify of pesticides, we use a standard deviation of retention time of these compounds between the samples and standard lower than 0,1 min.

### Determination of pesticides

The procedure of extraction is based on modified QuEChERS. An aliquot of sample is analyzed by GC-MS/MS and UPLC-MS/MS. The calibration is performed on matrix with internal standard.

### Equipment

For the chromatographic determination, a gas chromatograph and a liquid chromatograph of high resolution with detector of mass spectrometry (triple quadrupole) is used. As for the operational conditions they are detailed below.

### Materials

- Column 2 x 15 m x 0.25 mm d.i., 0.25 µm. Factor Four VF-5 MS
- Column Waters Acquity UPLC BEH C18 (100 mm x 2.1 mm d.i., 1.7 µm)
- Balance of 0,01 mg of resolution
- Balance of 0,1 mg of resolution
- Automatic micropipettes 10-100 µL
- Automatic micropipettes 100-1000 µL
- Volumetric flask of 2 mL and 50 mL
- Vials of chromatography
- Evaporator
- Centrifuge
- Plastic tube of 15 mL and 50 mL
- Mixer
- Generator of Nitrogen
- Agitator
- Gas Helium, quality 5.0
- Gas Argon, quality 5.0
- Nitrogen extrapure
- Ethyl acetate
- Acetonitrile

- Standard of pesticide
- Sorbent of clean-up (C18, PSA, GCB)
- GC chromatography 7000C Agilent
- LC Agilent Model 1290 and MS Sciex® Model 5500

#### Operational conditions in GC

- Column: 2 Column of Agilent HP- 5 15mx250 µm
- Inyection temperature: solvent vent (3 mL/min, purge)
- Carrier Gas: Helio
- Program of temperature: 70°C during 0,2 min, then 300 °C the reason of 210°C/min.
- Pressure/Flow in Column n°1: de 4 mL/min
- Pressure/Flow in Column n°2: de 4,8 mL/min
- Injection volume: 1 µl
- Source temperature: 280 °C
- Transfer line temperature: 280°C

#### Operational conditions in LC

- Column Waters Acquity UPLC BEH C18 (100 mm x 2.1 mm d.i., 1.7 µm)
- Temperature column: 30°C
- Mobile phase: 5 mM ammonium formiate: MeOH
- Curtain Gas (CUR) (V): 25
- Collision Gas (CAD) (V): 9
- Ion Spray Voltage (IS)(V): 5000
- Injection volume: 5 µl
- Source temperature: 400 °C

#### Validation-Quality parameters

The method is evaluated in terms of linearity, repeatability, reproducibility and accuracy. The quality parameters are detailed below

| Compound  | Linearity                                |           | RSD (%) <sup>a</sup> | RSD (%) <sup>b</sup> | Reproducibility  |                  | Accuracy         |                  |
|-----------|------------------------------------------|-----------|----------------------|----------------------|------------------|------------------|------------------|------------------|
|           | Regression coefficient (R <sup>2</sup> ) | Deviation |                      |                      | (%) <sup>a</sup> | (%) <sup>b</sup> | (%) <sup>a</sup> | (%) <sup>b</sup> |
| Pesticide | 1.00                                     | <20%      | <20                  | <20                  | <20              | <20              | <50              | <40              |

<sup>a</sup> calculated in limit of quantification; <sup>b</sup> five time limit of quantification

## References

[1] Guidance document on analytical quality control and method validation procedures for pesticide residues and analysis in food and feed. Nº SANTE/12682/2019

Table S2. Chemicals analysed in tadpole samples (values in mg/kg) by GC/MS-MS

|                     |         |                           |         |                  |         |
|---------------------|---------|---------------------------|---------|------------------|---------|
| 2-phenylphenol      | < 0.010 | Esfenvalerate+Fenvalerate | < 0.010 | Profenofos       | < 0.010 |
| Aclonifen           | < 0.010 | Ethiofencarb              | < 0.010 | Propachlor       | < 0.010 |
| Acrinathrin         | < 0.010 | Ethion                    | < 0.010 | Propargite       | < 0.010 |
| Azoxystrobin        | < 0.010 | Ethoprofos                | < 0.010 | Propiconazole    | < 0.010 |
| Benalaxyl           | < 0.010 | Etridiazol                | < 0.020 | Propoxur         | < 0.010 |
| Biphenyl            | < 0.010 | Etrimfos                  | < 0.010 | Prothiophos      | < 0.010 |
| Bifenox             | < 0.010 | Famoxadone                | < 0.010 | Pyrazofos        | < 0.010 |
| Bifenthrin          | < 0.010 | Fenamifos                 | < 0.010 | Pyridaben        | < 0.010 |
| Boscalid            | < 0.010 | Fenarimol                 | < 0.010 | Pyridafenthion   | < 0.010 |
| Bromacil            | < 0.010 | Fenitrothion              | < 0.010 | Pyrifenox        | < 0.010 |
| Bromophos-ethyl     | < 0.010 | Fenoxicarb                | < 0.010 | Pyrimethanil     | < 0.010 |
| Bromophos-methyl    | < 0.010 | Fenpropatr n              | < 0.010 | Pyriproxifen     | < 0.010 |
| Bromopropylate      | < 0.010 | Fenthion                  | < 0.010 | Quinalphos       | < 0.010 |
| Bupirimate          | < 0.010 | Fenthoate                 | < 0.010 | Quinomethionate  | < 0.010 |
| Buprofezin          | < 0.010 | Fipronil                  | < 0.010 | Quintozene       | < 0.010 |
| Butralin            | < 0.010 | Flucitrinato              | < 0.010 | S421             | < 0.020 |
| Cadusafos           | < 0.010 | Fludioxonil               | < 0.010 | Silafluofen      | < 0.010 |
| Captan              | < 0.010 | F olpet                   | < 0.010 | Sulphur          | < 0.010 |
| Carbophenothion     | < 0.010 | Fonofos                   | < 0.010 | Tau-fluvalinate  | < 0.010 |
| Chlordane           | < 0.010 | Formotion                 | < 0.010 | Tebuconazole     | < 0.010 |
| Chlorfenapyr        | < 0.010 | Fosalon                   | < 0.010 | Tecnazene        | < 0.010 |
| Chlorfenson         | < 0.010 | Fosmet                    | < 0.010 | Tefluthrin       | < 0.010 |
| Chlorfenvinfos      | < 0.010 | Furalaxil                 | < 0.010 | Terbutrin        | < 0.010 |
| Chlormefos          | < 0.010 | Furatiocarb               | < 0.010 | Tetrachlorvinfos | < 0.010 |
| Chlorobenside       | < 0.010 | Hexaconazole              | < 0.010 | Tetraconazole    | < 0.010 |
| Chloropropilato     | < 0.010 | Iprodione                 | < 0.010 | Tetradifon       | < 0.010 |
| Chlorotalonil       | < 0.010 | Isocarbofos               | < 0.010 | Tolclofos-methyl | < 0.010 |
| Chlorpyrifos        | < 0.010 | Isofenfos                 | < 0.010 | Tolyfluanide     | < 0.010 |
| Chlorpyrifos-methyl | < 0.010 | Isofenfos-methyl          | < 0.010 | Transfluthrin    | < 0.010 |
| Chlortal- dimethyl  | < 0.010 | Lamda- cyhalothrin        | < 0.010 | Trifluralin      | < 0.010 |
| Chlozolate          | < 0.010 | Lindane                   | < 0.010 | Vinclozolin      | < 0.010 |
| Cresoxim-methyl     | < 0.010 | Malathion                 | < 0.010 |                  |         |
| Cyanofenphos        | < 0.010 | Metalaxil                 | < 0.010 |                  |         |
| Cycloate            | < 0.010 | Metamidophos              | < 0.010 |                  |         |
| Cyfluthrin          | < 0.010 | Methidathion              | < 0.010 |                  |         |
| Cynidon-ethyl       | < 0.010 | Methoxychlor              | < 0.010 |                  |         |
| Cypermethrin        | < 0.010 | Mevinfos                  | < 0.010 |                  |         |
| Cyproconazole       | < 0.010 | Myclobutanil              | < 0.010 |                  |         |
| Cyanofenphos        | < 0.010 | Norflurazon               | < 0.010 |                  |         |
| Deltamethrin        | < 0.010 | Nuarimol                  | < 0.010 |                  |         |
| Diazinon            | < 0.010 | Oxadixyl                  | < 0.010 |                  |         |
| Dichlobenil         | < 0.010 | Oxifluorfen               | < 0.010 |                  |         |
| Dichlofenthion      | < 0.010 | p.p'-DDD + o.p-DDT        | < 0.010 |                  |         |
| Dichlofluanide      | < 0.010 | p.p' -DDE                 | < 0.010 |                  |         |
| Dichloran           | < 0.010 | p.p'-DDT                  | < 0.010 |                  |         |
| Diclorvos           | < 0.010 | Parathion                 | < 0.010 |                  |         |
| Dicofol             | < 0.010 | Parathion-methyl          | < 0.010 |                  |         |
| Dieldrin            | < 0.010 | Penconazole               | < 0.010 |                  |         |
| Difenoconazole      | < 0.010 | Pendimethalin             | < 0.010 |                  |         |
| Di metomor f        | < 0.010 | Permethrin                | < 0.010 |                  |         |
| Endosulfan al fa    | < 0.010 | Pirimiphos-ethyl          | < 0.010 |                  |         |
| Endosulfan beta     | < 0.010 | Pirimiphos-methyl         | < 0.010 |                  |         |
| Endosulfan sulfato  | < 0.010 | Procymidone               | < 0.010 |                  |         |
| Endrin              | < 0.010 | Prochloraz                | < 0.010 |                  |         |

Table S3. Chemicals analysed in tadpole samples (values in mg/kg) by UPLC/MS-MS

|                         |         |                        |         |                      |         |
|-------------------------|---------|------------------------|---------|----------------------|---------|
| AMPA*                   | < 0.05  | Espiromesifen          | < 0.010 | Paclobutrazol        | < 0.010 |
| Abamectin               | < 0.010 | Espiroxamine           | < 0.010 | Paraquat*            | < 0.020 |
| Acephate                | < 0.010 | Ethiofencarb sulfone   | < 0.010 | Pencicuron           | < 0.010 |
| Acetamiprid             | < 0.010 | Ethiofencarb sulfoxide | < 0.010 | Pirimicarb           | < 0.010 |
| Aldicarb                | < 0.010 | Etofenprox             | < 0.010 | Promecarb            | < 0.010 |
| Aldicarb-sulphate       | < 0.010 | Etofumesato            | < 0.010 | Propamocarb          | < 0.010 |
| Aldicarb-sulfoxide      | < 0.010 | Etozazole              | < 0.010 | Pymetrozine          | < 0.010 |
| Amitraz                 | < 0.010 | Etoxyquine             | < 0.010 | Piperonil-butoxide   | < 0.010 |
| Azaconazole             | < 0.010 | Fenazaquine            | < 0.010 | Pyraclostrobin       | < 0.010 |
| Azadirachtin            | < 0.010 | Fenbuconazole          | < 0.010 | Quinosol             | < 0.010 |
| Azinphos-ethyl          | < 0.010 | Fenbutatin oxide       | < 0.010 | Quinoxifen           | < 0.010 |
| Azinphos-methyl         | < 0.010 | Fenhexamid             | < 0.010 | Simacine             | < 0.010 |
| Bendiocarb              | < 0.010 | Fenmedifan             | < 0.010 | Spinosad             | < 0.010 |
| Bioaletrine             | < 0.010 | Fenpiroximate          | < 0.010 | Spiroclufen          | < 0.010 |
| Bitertanol              | < 0.010 | Fenpropidine           | < 0.010 | Tebufenocide         | < 0.010 |
| Bromuconazole           | < 0.010 | Fenpropimorph          | < 0.010 | Tebufenpirad         | < 0.010 |
| Butocarboxim            | < 0.010 | Fensulfothion          | < 0.010 | Teflubenzuron        | < 0.010 |
| Butocarboxim-sulphoxide | < 0.010 | Fonicamid              | < 0.010 | Terbufos             | < 0.010 |
| Butoxycarboxim          | < 0.010 | Flubendiamide          | < 0.010 | Terbutaline          | < 0.010 |
| Captafol                | < 0.010 | Flufenoxuron           | < 0.010 | Thiabendazole        | < 0.010 |
| Carbaril                | < 0.010 | Fluquinconazole        | < 0.010 | Thiacloprid          | < 0.010 |
| Carbendazime            | < 0.010 | Flurocloridone         | < 0.010 | Thiametoxam          | < 0.010 |
| Carbofuran              | < 0.010 | Flusilazol             | < 0.010 | Thiodicarb           | < 0.010 |
| Carbofuran-3-hydroxy    | < 0.010 | Flutolanil             | < 0.010 | Thiofanate-methyl    | < 0.010 |
| Chlorantraniliprole     | < 0.010 | Flutriafol             | < 0.010 | Thiofanox            | < 0.010 |
| Chloridazon             | < 0.010 | Forclorfenuron         | < 0.010 | Thiofanox-sulfone    | < 0.010 |
| Chlormequat*            | < 0.010 | Formetanate            | < 0.010 | Thiofanox-sulfoxide  | < 0.010 |
| Clofentezine            | < 0.010 | Fosfamidon             | < 0.010 | Triadimefon          | < 0.010 |
| Clothianidin            | < 0.010 | Furmecyclozox          | < 0.010 | Triadimenol          | < 0.010 |
| Coumaphos               | < 0.010 | Glyphosate*            | < 0.05  | Triazofos            | < 0.010 |
| Cyhexatine              | < 0.010 | Gluphosinate*          | < 0.05  | Trichlorfon          | < 0.010 |
| Cymoxanil               | < 0.010 | Hexitiazox             | < 0.010 | Tricresyl -phosphate | < 0.010 |
| Cyprodinil              | < 0.010 | Himexazole             | < 0.010 | Trifloxystrobin      | < 0.010 |
| Cyromazine              | < 0.010 | Imazalil               | < 0.010 | Triflumizole         | < 0.010 |
| Demeton-S-methyl        | < 0.010 | Imidacloprid           | < 0.010 | Triflumuron          | < 0.010 |
| Demeton- S-methyl-iso   | < 0.010 | Indoxacarb             | < 0.010 | Vamidothion          | < 0.010 |
| Desmetrin               | < 0.010 | Iprovalicarb           | < 0.010 |                      |         |
| Diclobutrazole          | < 0.010 | Linuron                | < 0.010 |                      |         |
| Diclofluanide           | < 0.010 | Lufenuron              | < 0.010 |                      |         |
| Dichlorobenzamide       | < 0.010 | Mecarbam               | < 0.010 |                      |         |
| Dicrotofos              | < 0.010 | Mepanipyrim            | < 0.010 |                      |         |
| Dietofencarb            | < 0.010 | Mepiquat*              | < 0.010 |                      |         |
| Difenilamine            | < 0.010 | Metaflumizone          | < 0.010 |                      |         |
| Diflubenzuron           | < 0.010 | Methiocarb             | < 0.010 |                      |         |
| Dimethoate              | < 0.010 | Methiocarb-sulfone     | < 0.010 |                      |         |
| Diniconazole            | < 0.010 | Methiocarb-sulfoxide   | < 0.010 |                      |         |
| Diquat*                 | < 0.020 | Methomyl               | < 0.010 |                      |         |
| Disulfoton              | < 0.010 | Methoxyfenocide        | < 0.010 |                      |         |
| Disulfoton- sulfone     | < 0.010 | Monocrotofos           | < 0.010 |                      |         |
| Disulfoton-sulfoxide    | < 0.010 | Nitempyram             | < 0.010 |                      |         |
| Diuron                  | < 0.010 | Ofurace                | < 0.010 |                      |         |
| Dodine                  | < 0.010 | Omethoate              | < 0.010 |                      |         |
| Emamectin- benzoate     | < 0.010 | Oxamyl                 | < 0.010 |                      |         |
| Epoxiconazole           | < 0.010 | Oxidemeton- methyl     | < 0.010 |                      |         |

\* = mg/l

Table S4. Biological measurements recorded from túngara frogs collected from reference, suburban and agricultural sites.

|                    | Reference         |                   |                     | Suburban          |                   |                     |                       |             | Agricultural      |                   |                     |          |             |
|--------------------|-------------------|-------------------|---------------------|-------------------|-------------------|---------------------|-----------------------|-------------|-------------------|-------------------|---------------------|----------|-------------|
| MALES              | 2016 <sup>a</sup> | 2018 <sup>a</sup> | Pooled <sup>b</sup> | 2016 <sup>a</sup> | 2018 <sup>a</sup> | Pooled <sup>b</sup> | <i>P</i> <sup>d</sup> | Fold change | 2016 <sup>a</sup> | 2018 <sup>a</sup> | Pooled <sup>b</sup> | <i>P</i> | Fold change |
| Weight (g)         | 1.2-2.5           | 1.7-3.2           | 2.3                 | 0.8-4.7           | 1.2-3.8           | 2.3                 | 0.48                  | 1           | 0.9-2.1           | 0.8-2.2           | 1.3                 | <0.0001  | -1.77 ↓     |
| SVL (mm)           | 25-32             | 26-33             | 29.5                | 20-37             | 26-32             | 28.0                | >0.99                 | -1.05       | 22-32             | 22-26             | 24.9                | <0.0001  | -1.18 ↓     |
| CI                 | 0.06-0.09         | 0.07-0.1          | 0.07                | 0.04-0.12         | 0.05-0.1          | 0.08                | 0.6                   | -1.02       | 0.04-0.1          | 0.03-0.12         | 0.06                | 0.0001   | -1.16 ↓     |
| FLW (mm)           | 1.8-3.6           | 2.4-3.5           | 2.8 <sup>c</sup>    | 1.8-3.5           | 2.2-3.6           | 2.8 <sup>c</sup>    | 0.93                  | 1           | 1.8-3.0           | 1.5-2.6           | 2.1 <sup>c</sup>    | <0.0001  | -1.33 ↓     |
| NP Length (mm)     | 1.3-2.0           | 0.8-1.9           | 1.5 <sup>c</sup>    | 0.9-2.5           | 0.4-2.9           | 1.6                 | 0.27                  | +1.06       | 1.0-1.7           | 0.4-1.3           | 1.30 <sup>c</sup>   | 0.026    | -1.15 ↓     |
| FEMALES            |                   |                   | Pooled <sup>b</sup> |                   |                   | Pooled <sup>b</sup> | <i>P</i>              | Fold change |                   |                   | Pooled <sup>b</sup> | <i>P</i> | Fold change |
| Weight (g)         | 1.3-3.9           | 2-3.8             | 2.6                 | 1.2-3.4           | 2.1-4.9           | 3.0                 | 0.003                 | +1.15 ↑     | 0.9-2.8           | 1-2.2             | 1.2                 | <0.0001  | -2.16 ↓     |
| SVL (mm)           | 26-35             | 29-38             | 31.4                | 22-38             | 28-38             | 32.2                | 0.12                  | +1.03       | 21-37             | 24-28             | 24.9                | <0.0001  | -1.26 ↓     |
| CI                 | 0.05-0.11         | 0.07-0.13         | 0.08 <sup>c</sup>   | 0.06-0.12         | 0.08-0.13         | 0.09 <sup>c</sup>   | <0.001                | +1.13 ↑     | 0.03-0.09         | 0.04-0.08         | 0.06 <sup>c</sup>   | <0.0001  | -1.3 ↓      |
| PAIRS              |                   |                   | Pooled <sup>b</sup> |                   |                   | Pooled <sup>b</sup> | <i>P</i>              | Fold change |                   |                   | Pooled <sup>b</sup> | <i>P</i> | Fold change |
| Fecundity (number) | 236-838           | 205-699           | 438.5               | 196-845           | 52-664            | 459.0               | 0.91                  | +1.05       | 100-879           | 91-280            | 175.0               | <0.0001  | -2.5 ↓      |
| Hatching (number)  | 234-831           | 3-693             | 430.0               | 196-897           | 27-661            | 455.0               | >0.99                 | +1.06       | 99-852            | 0-268             | 155.5               | <0.0001  | -2.77 ↓     |
| Fertility (%)      | 98-100            | 0.7-100           | 99.07               | 91-100            | 52-100            | 99.09               | >0.99                 | ~1          | 95-100            | 0-100             | 96.89               | 0.009    | -1.02 ↓     |

<sup>a</sup> Range of values, <sup>b</sup> Median values, <sup>c</sup> Mean value (condition index (CI)/forelimb width (FLW) data normally distributed). <sup>d</sup> *p* value refers to comparison between reference

and suburban/agricultural sites with multiplicity adjusted *p* values (normally distributed data: Bonferroni; not-normally distributed data: Dunn's). Abbreviations: SVL =

snout-vent length; CI = condition index, FLW = forelimb width



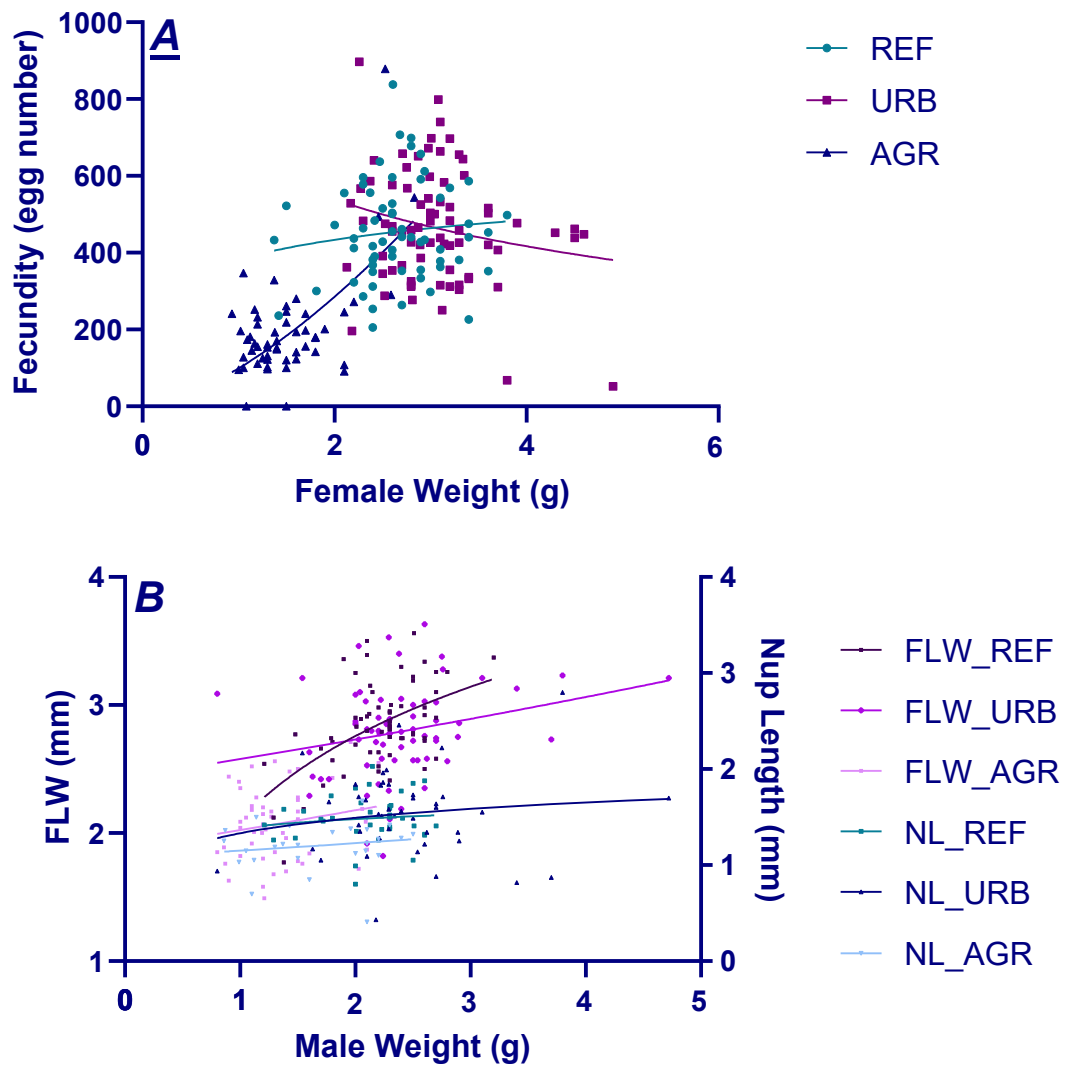

Figure S2. Correlations between female weight with fecundity (A: REF  $R^2 = 0.01$ ; URB  $R^2 = 0.04$ ; AGR  $R^2 = 0.34$ ) and male weight with forelimb width (FLW: B: REF  $R^2 = 0.35$ ; URB  $R^2 = 0.06$ ; AGR  $R^2 = 0.04$ ) or nuptial pad (Nup) length (B: REF  $R^2 = 0.01$ ; URB  $R^2 = 0.01$ ; AGR  $R^2 = 0.02$ ) in tungara frogs collected from reference (REF), agricultural (AGR) and suburban (URB) sites.
